# Supplementary material for: National implementation of a digital Parkinson’s disease screening programme in Thailand: reach, usability, and real-world performance of the CheckPD app
Source: Research Square preprint supplement (doi:10.21203/rs.3.rs-8565015/v1), 2026-02-11
Supplement: Supplementary file 1 [file b43543da9a5d790f361be8fe.docx]

**Supplementary Data 2.** Neurologist-confirmed outcomes of ‘at risk’ CheckPD screenings by province (n = 730).

| **No** | **Provinces** | **CheckPD AI evaluation** | | **Neurologist’s diagnosis** | |
| --- | --- | --- | --- | --- | --- |
| **PD** | **Control** |
| 1 | Bangkok | At risk | | 115 | 1 |
| 2 | Nakhon Pathom | At risk | | 98 | 6 |
| 3 | Phetchaburi | At risk | | 24 | 6 |
| 4 | Si Sa Ket | At risk | | 48 | 3 |
| 5 | Nakhon Sawan | At risk | | 127 | 15 |
| 6 | Chiang Rai | At risk | | 84 | 6 |
| 7 | Nonthaburi | At risk | | 31 | 9 |
| 8 | Pathum Thani | At risk | | 32 | 0 |
| 9 | Samut Prakan | At risk | | 34 | 91 |
| 10 | Chonburi | At risk | | 0 | 0 |
|  | **Total** | | **730** | **593** | **137** |

PD, Parkinson’s disease
